# Supplementary material for: Neuronal Subtype and Satellite Cell Tropism Are Determinants of Varicella-Zoster Virus Virulence in Human Dorsal Root Ganglia Xenografts In Vivo
Source: PubMed Central journal article supplement (PMC4474629; doi:10.1371/journal.ppat.1004989), 2015-06-19
Supplement: ppat.1004989.s002.pdf [file ppat.1004989.s002.pdf]

## S2 Fig. Additional cytokine array dataset

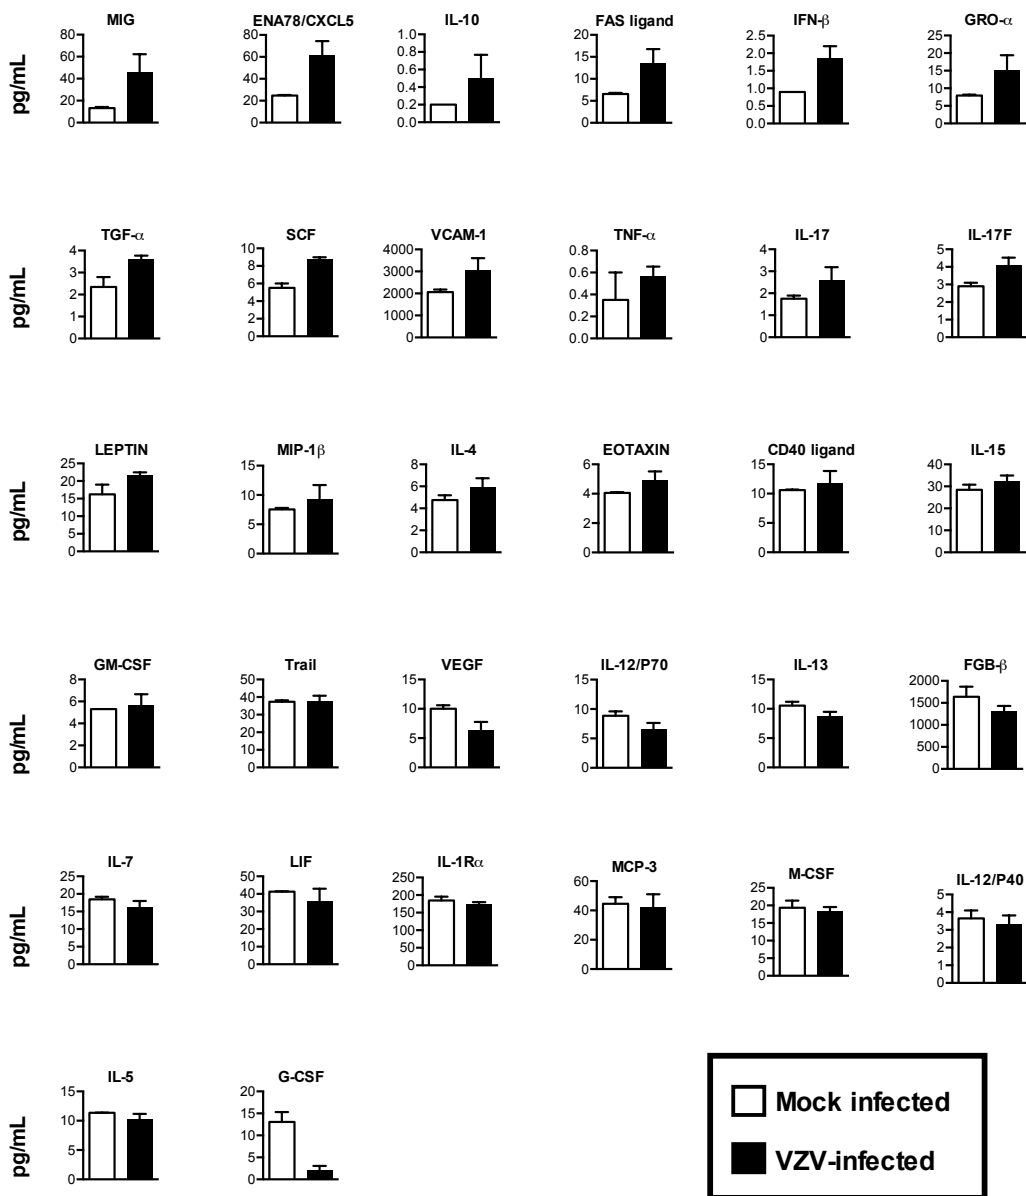

Cellular factors made by SGC and other DRG resident cells were profiled in DRG lysates. Shown here are the 32 cytokines that were unchanged (did not meet significance by ttest compared with mock-infected). Statistical analyses were performed using GraphPad Prism version 6.0. Mock infected, white bars; VZV-infected, black bars. Cytokines (N=19) that did meet significant criteria are shown in **S1 Fig**. Methods are detailed in **S1 Fig**.
